# Supplementary material
Source: PubMed Central journal article supplement (PMC4992588)
Supplement: NIHMS798550-supplement-1.pdf [file NIHMS798550-supplement-1.pdf]

# Supplementary figures

## Supplementary Figure 1:

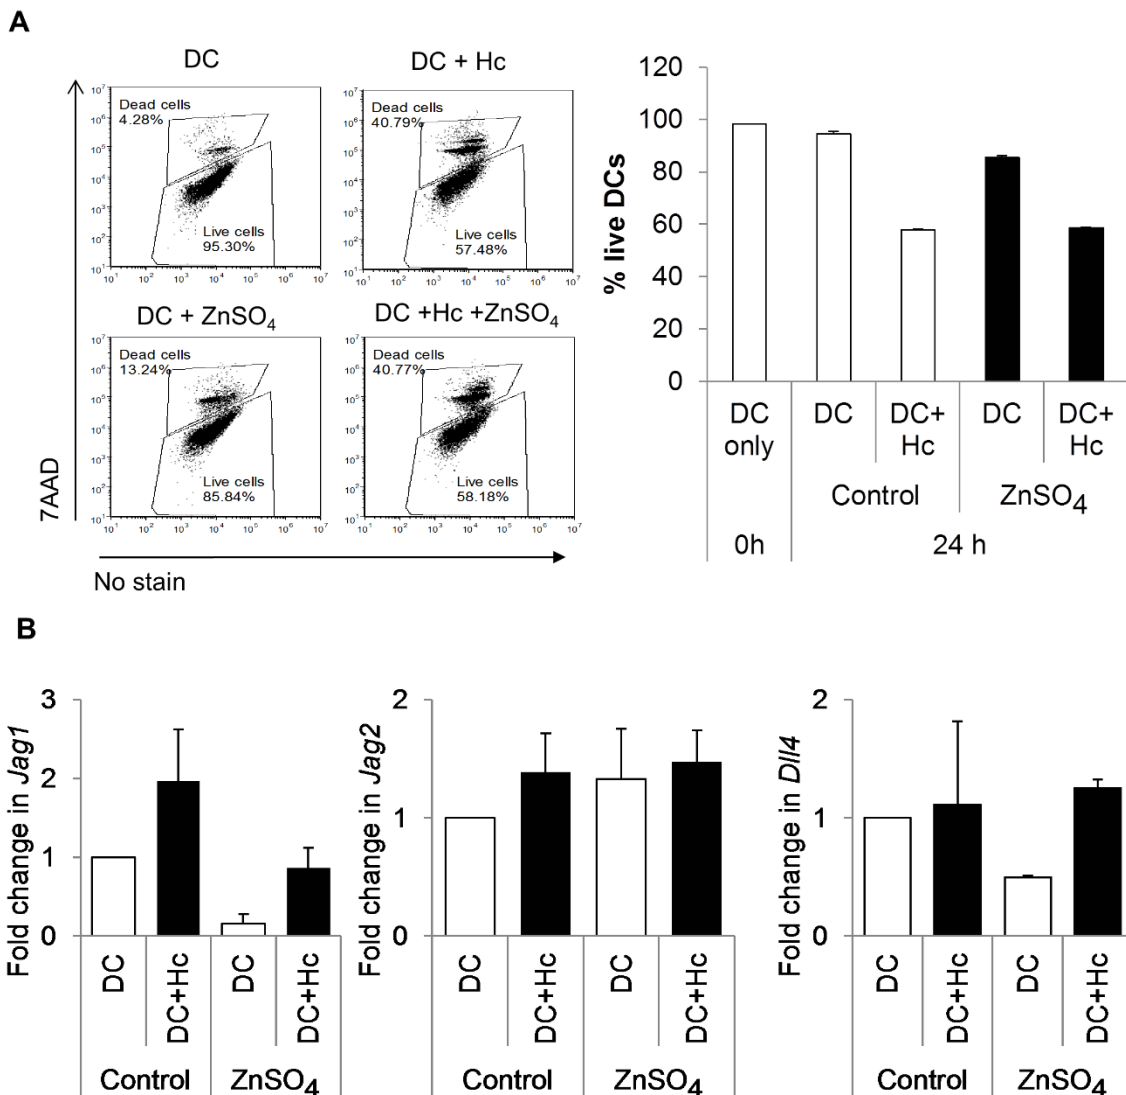

## Supplementary Figure 1: DC viability and expression of notch ligands in Zn treated DCs

**A)** Dot plots of DCs stained with 7AAD, values represent percent 7AAD<sup>+</sup> cells 24 h post Zn treatment, bar graph of percent live DCs at 0 h and 24 h post culture. 1 experiment, data are mean  $\pm$  SEM; and **B)** Fold change in *Jag1*, *Jag2* and *Dll4* expression with 100  $\mu$ M ZnSO<sub>4</sub> normalized to DC control, 1 experiment.

## Supplementary Figure 2:

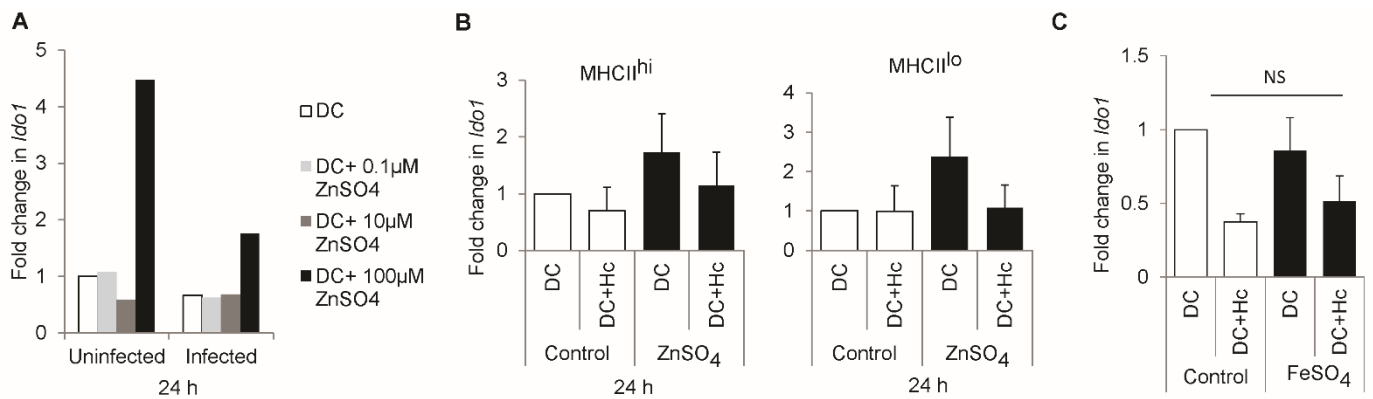

## Supplementary Figure 2: *Ido* expression in Zn treated DCs

**A)** Fold change in *Ido1* expression with 0.1, 10 and 100 μM ZnSO<sub>4</sub> in uninfected and infected states 1 experiment; **B)** Fold change in *Ido1* expression in MHCII<sup>hi</sup> DCs (1 experiment) and MHCII<sup>lo</sup> DCs (3 independent experiments) 24 h post ZnSO<sub>4</sub> treatment and infection normalized to control DC group; and **C)** Fold change in *Ido1* expression in control and 100 μM FeSO<sub>4</sub> treated DCs with or without *H. capsulatum* infection for 24 h normalized to control DC group, 3 independent experiments, data presented as mean fold change in expression ± SEM, NS, not significant by one-way ANOVA.

Supplementary Figure 3:

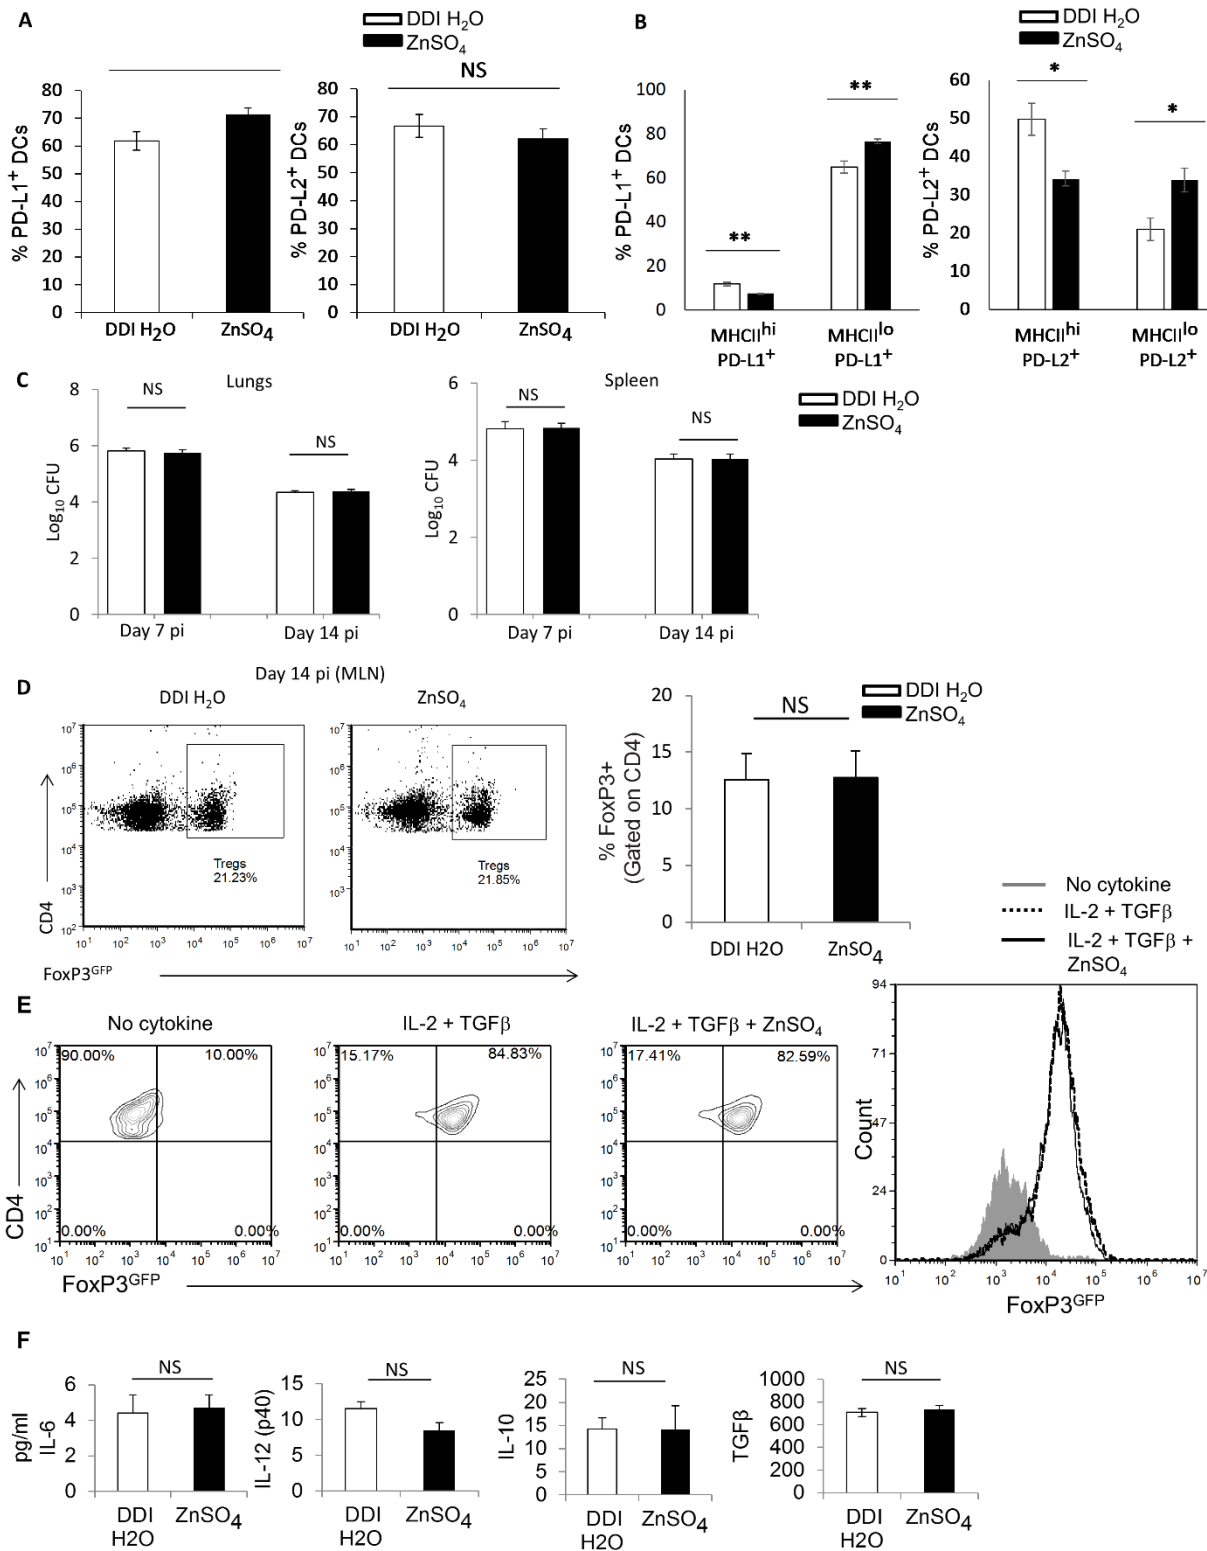

**Supplementary Figure 3: Effect of Zn on DC tolerogenicity and fungal burden**  
***in vivo* and Treg differentiation *in vitro***

**A)** Graphical representation of total % PD-L1<sup>+</sup> and PD-L2<sup>+</sup> DCs in lungs of DDI H<sub>2</sub>O and ZnSO<sub>4</sub> treated mice on day 14 *p.i.* (n=6 mice per group); **B)** Percent of PD-L1<sup>+</sup> and PD-L2<sup>+</sup> DCs (gated on MHCII<sup>hi</sup> CD11c<sup>+</sup> and MHCII<sup>lo</sup> CD11c<sup>+</sup>) in lung leukocytes of DDI H<sub>2</sub>O and ZnSO<sub>4</sub> treated mice on day 14 *p.i.* (n=6 mice per group); **C)** Fungal burden in lungs and spleens on days 7 and 14 *p.i.* in DDI H<sub>2</sub>O and ZnSO<sub>4</sub> treated mice, (n=8 mice per group); **D)** Dot plots of percent FoxP3<sup>+</sup> Tregs gated on CD4<sup>+</sup> cells in mediastinal lymph nodes, bar graph of percent FoxP3<sup>+</sup> Tregs day 14 *p.i.* in MLN in DDI H<sub>2</sub>O and ZnSO<sub>4</sub> treated mice, (n=8 mice per group); **E)** Percent CD4<sup>+</sup>FoxP3<sup>+</sup> T cells in *in vitro* cultures left untreated, or treated with IL-2 + TGFβ or with IL-2 + TGFβ + 100 μM ZnSO<sub>4</sub> and histogram showing MFI of FoxP3 in these groups; and **F)** IL-6 and IL-12 (p40), IL-10 and TGFβ protein levels in lung homogenates of DDI H<sub>2</sub>O and ZnSO<sub>4</sub> treated mice on day 14 *p.i.*, (n=4 mice per group), data expressed as mean ± SEM, Student's t test, \* *p* < 0.05; \*\* *p* < 0.01.

## Supplementary Figure 4:

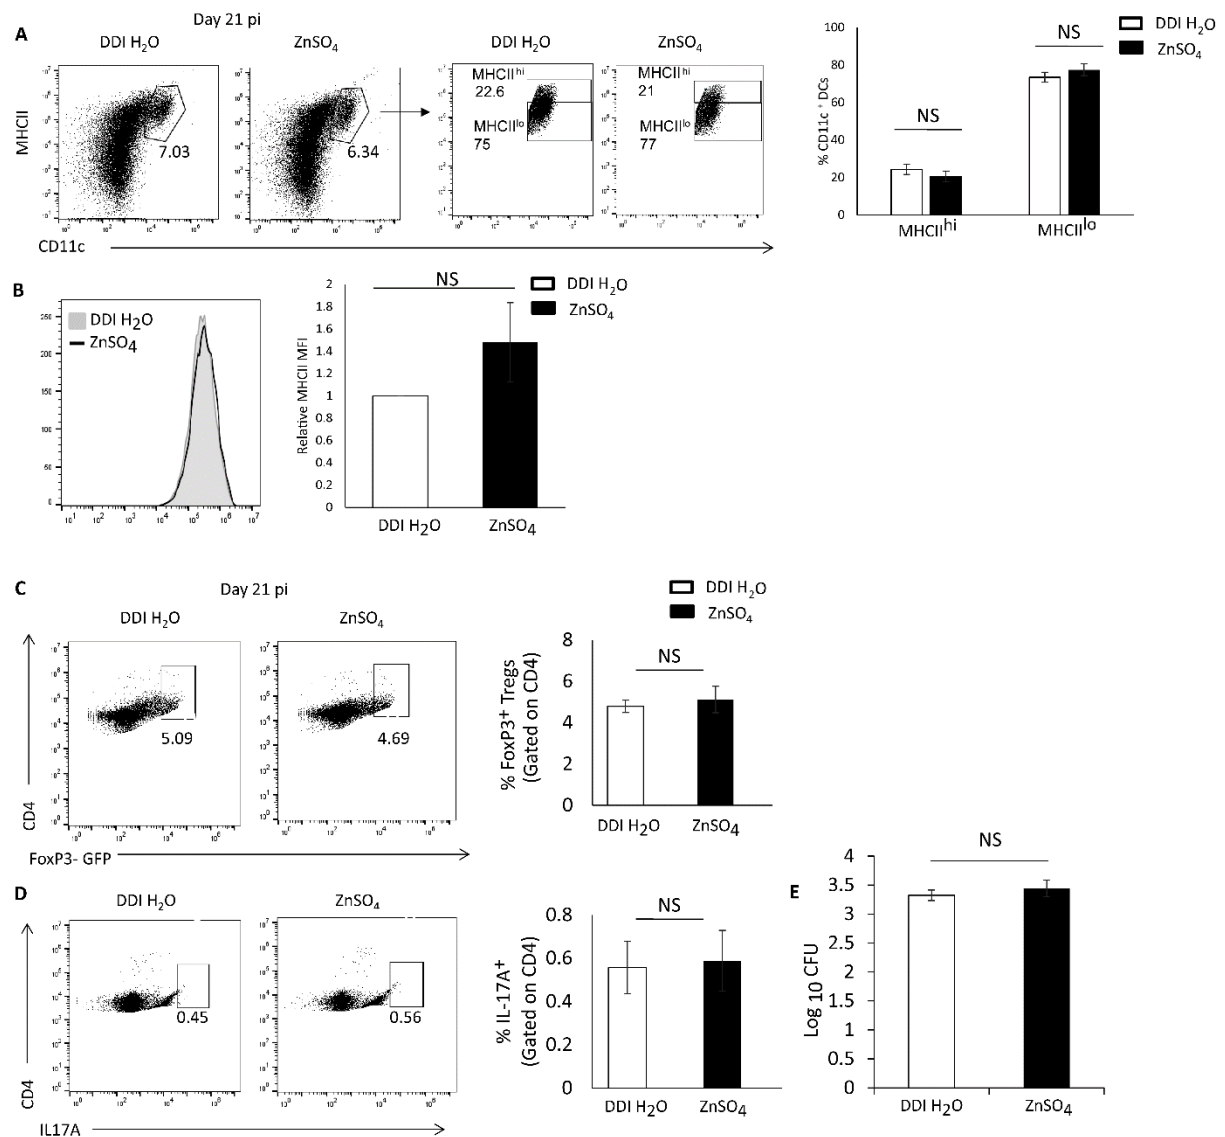

## Supplementary Figure 4: *In vivo* proportions of MHCII<sup>hi</sup> and MHCII<sup>lo</sup> DCs, Tregs, Th17 cells and fungal burden in lung leukocytes of Zn treated mice 21 days post infection

**A)** Dot plots and bar graph of percent CD11c<sup>+</sup> MHCII<sup>+</sup> DCs in lung leukocytes on day 21 *p.i.* DC gate subdivided into MHCII<sup>hi</sup> and MHCII<sup>lo</sup> populations; **B)** Histograms showing MHCII MFI in DCs. Relative MHCII MFI of ZnSO<sub>4</sub> treated mice normalized to average MHCII MFI of DDI H<sub>2</sub>O control mice in lung leukocytes; **C)** Dot plots and

bar graph of percent FoxP3<sup>+</sup>Tregs in DDI H<sub>2</sub>O and ZnSO<sub>4</sub> treated mice on day 21 *p.i.*; **D)** Dot plots and bar graph of percent Th17 cells in DDI H<sub>2</sub>O and ZnSO<sub>4</sub> treated mice on day 21 *p.i.* (n=6 mice per group), Data expressed as mean ± SEM; and **E)** Fungal burden in lungs of DDI H<sub>2</sub>O and ZnSO<sub>4</sub> treated mice on day 21 *p.i.* Data expressed as mean CFU ± SEM, (n=6 mice per group).
